# Supplementary material for: In Vivo Brillouin Analysis of the Aging Crystalline Lens
Source: PubMed Central journal article supplement — Invest Ophthalmol Vis Sci. 2016 Oct;57(13):5093–100. doi: 10.1167/iovs.16-20143 (PMC5054731; doi:10.1167/iovs.16-20143), 2016-10

## Supplementary information:

**Figure S1.** Sagittal lens profiles (dots with error bars) and fit (red line) for all subjects imaged in this study. In the figures, the anterior and posterior central plateau fits (solid red line) are connected to the anterior and posterior peripheral fit (dashed red line) at their intersection point. For details about the fitting parameter used, please refer to main text.

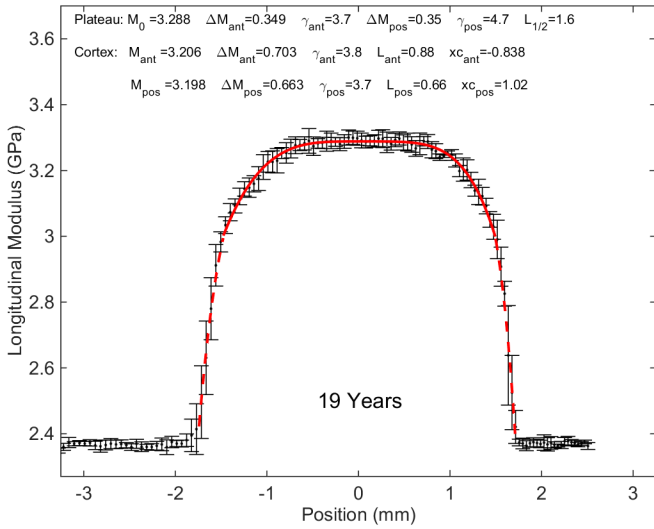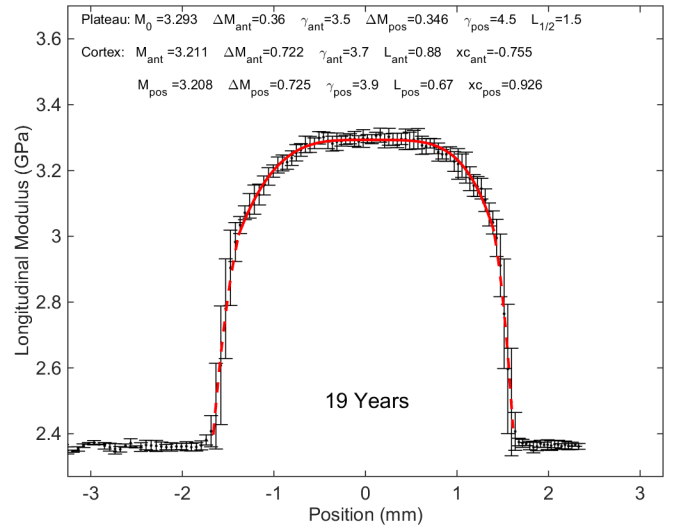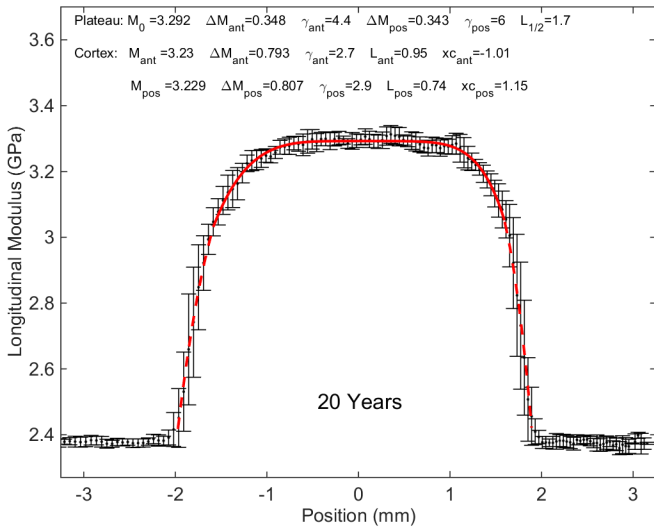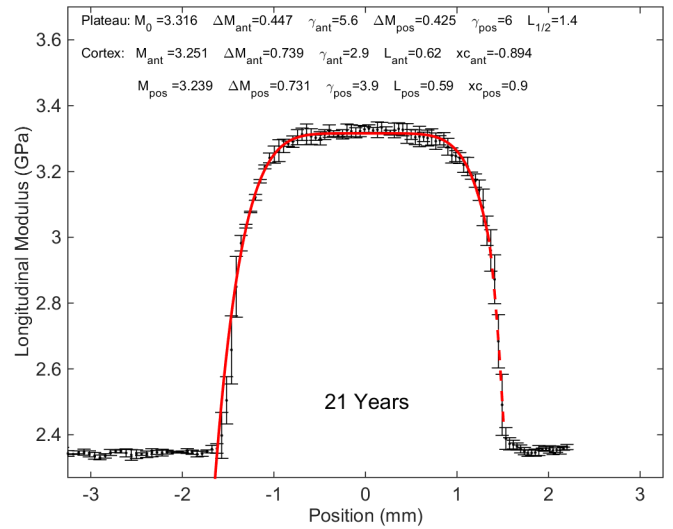

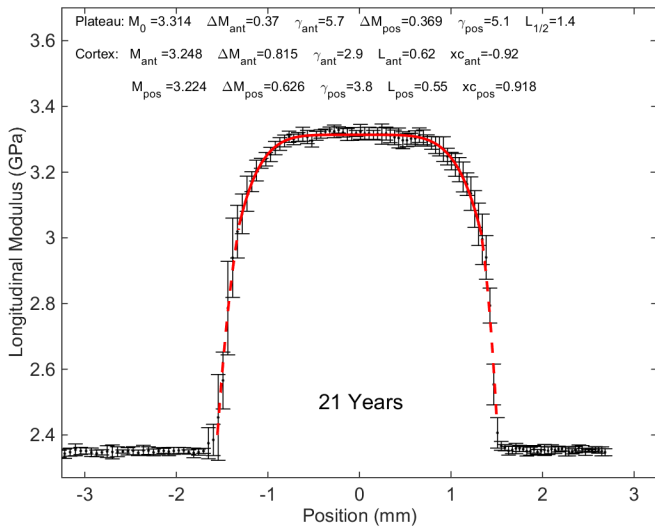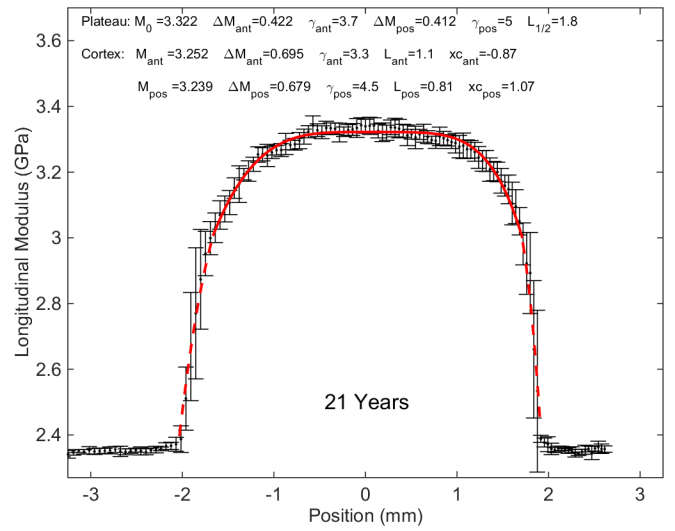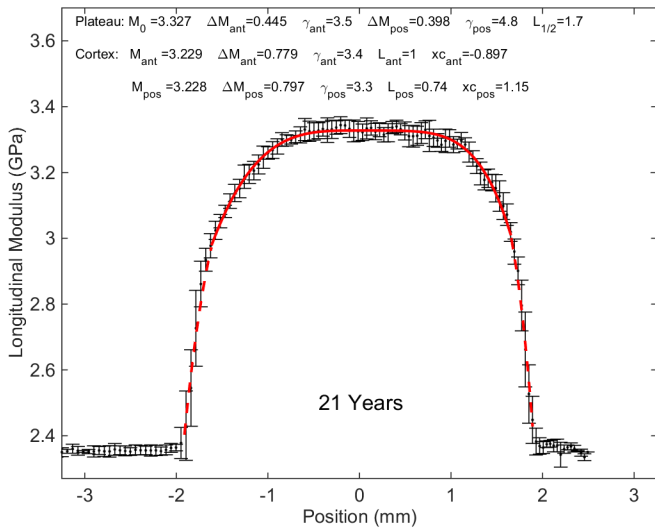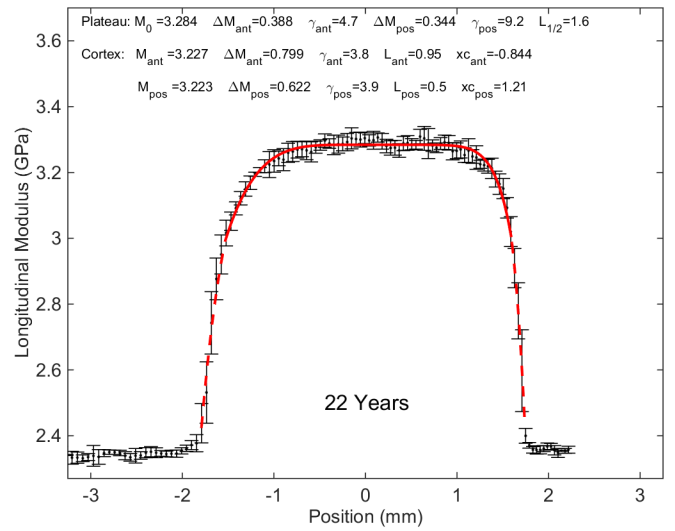

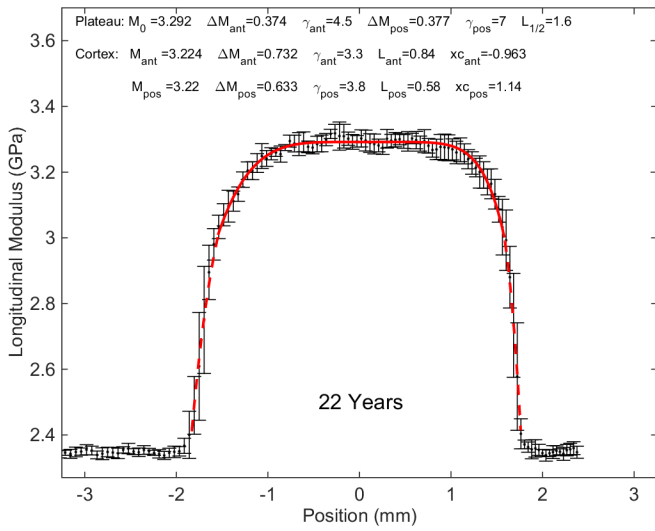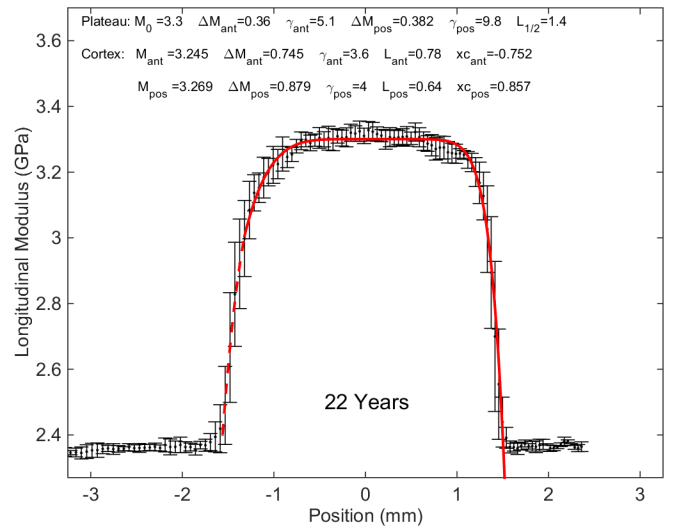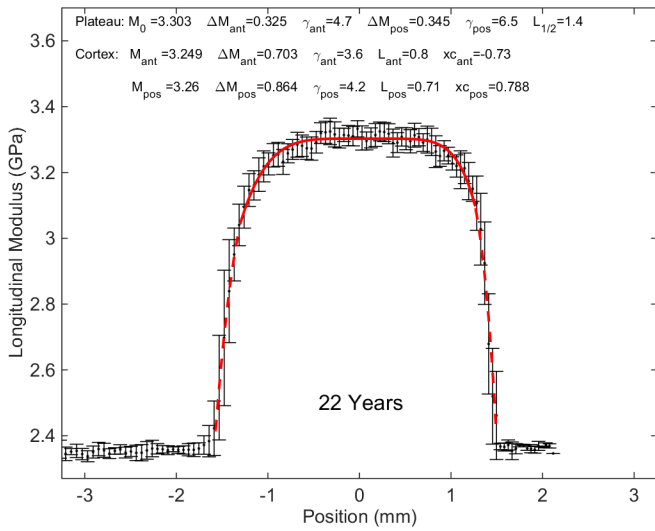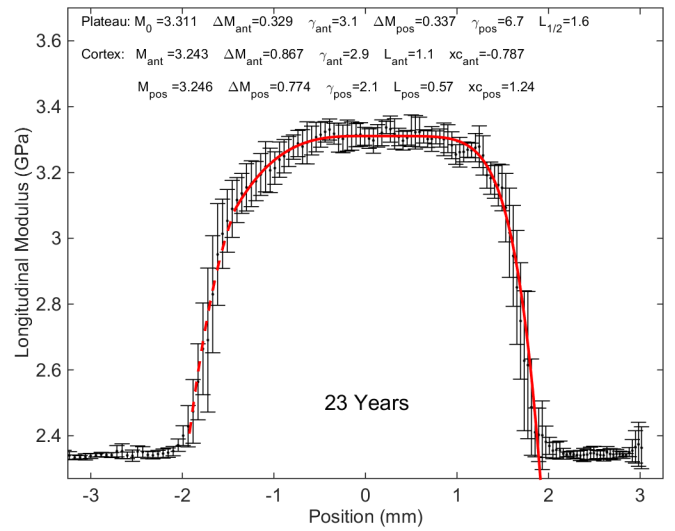

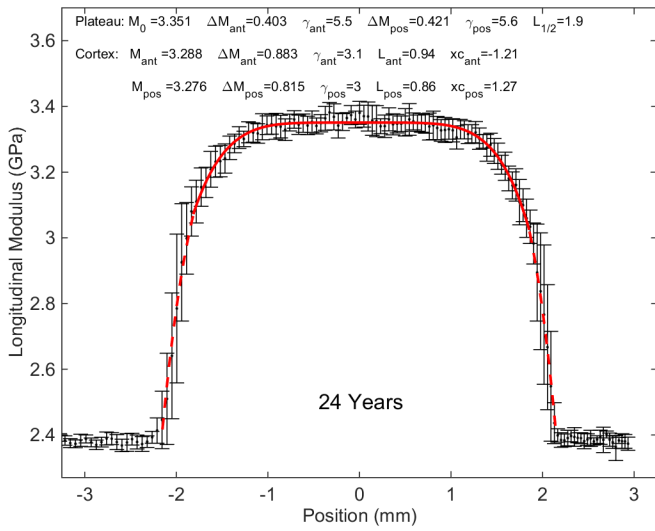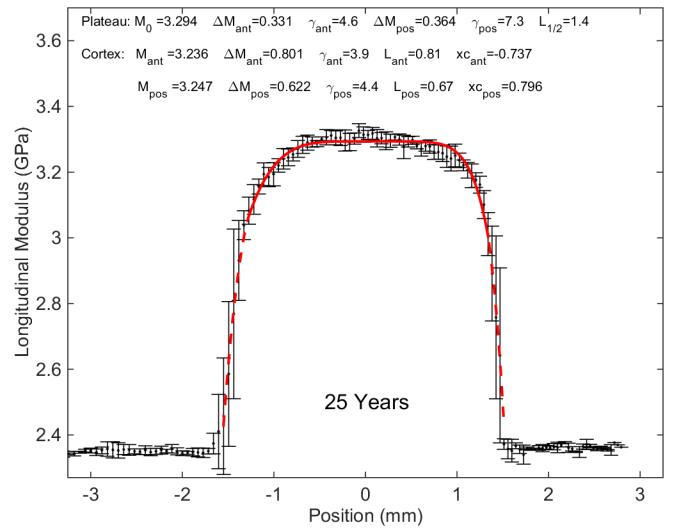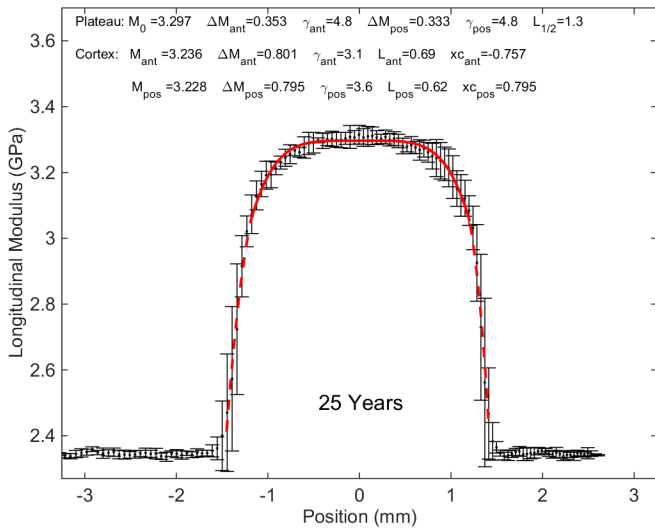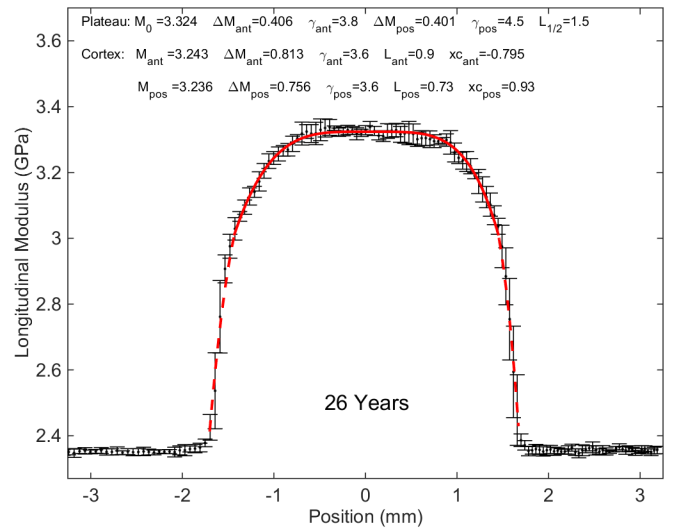

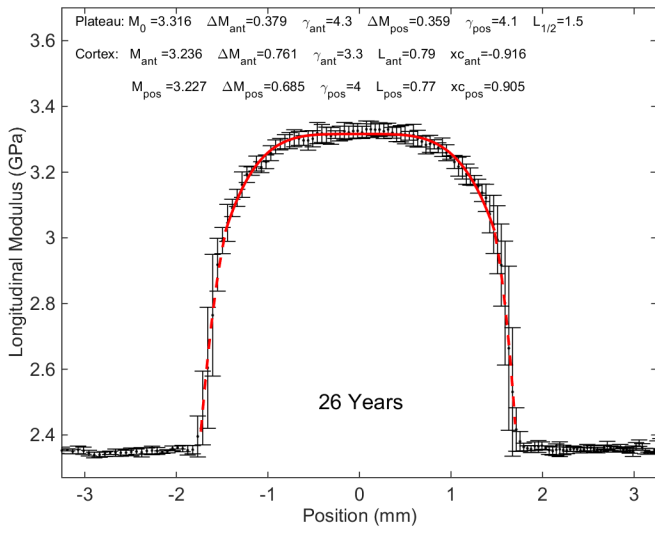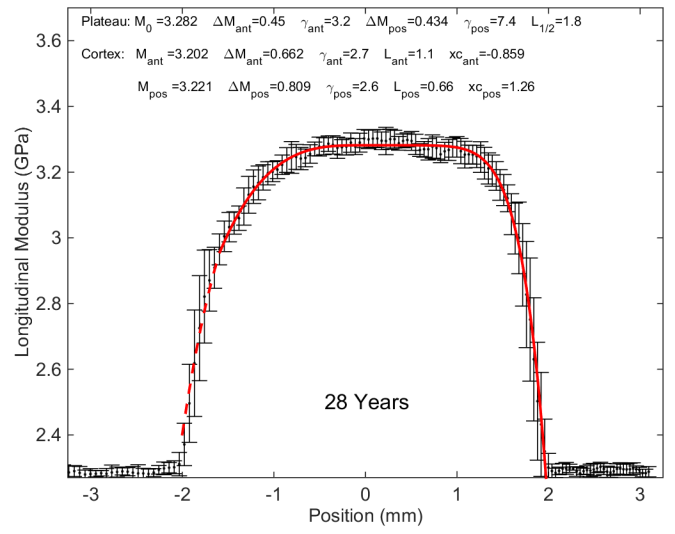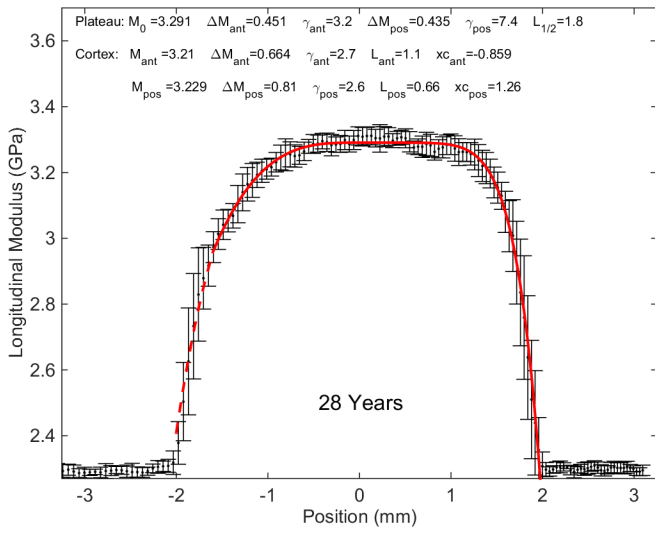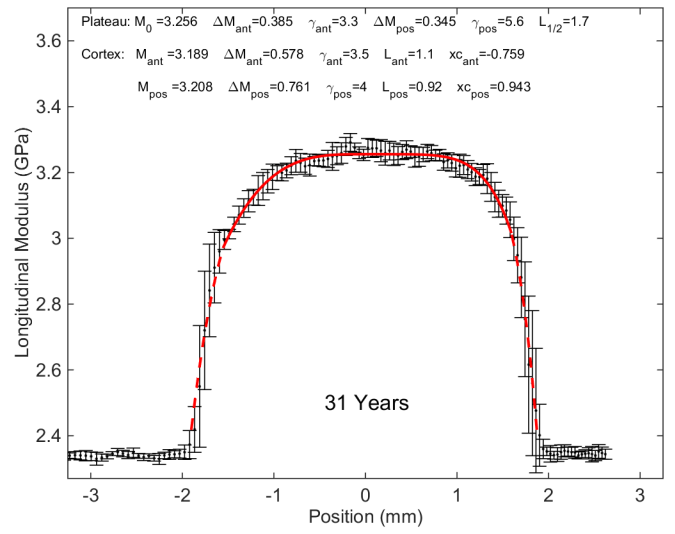

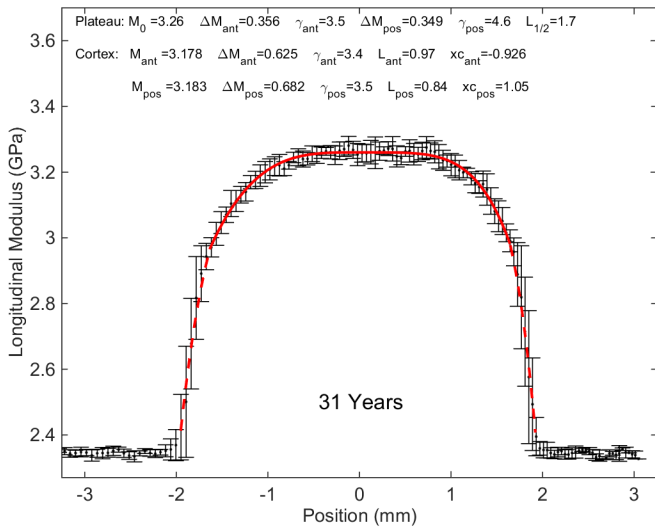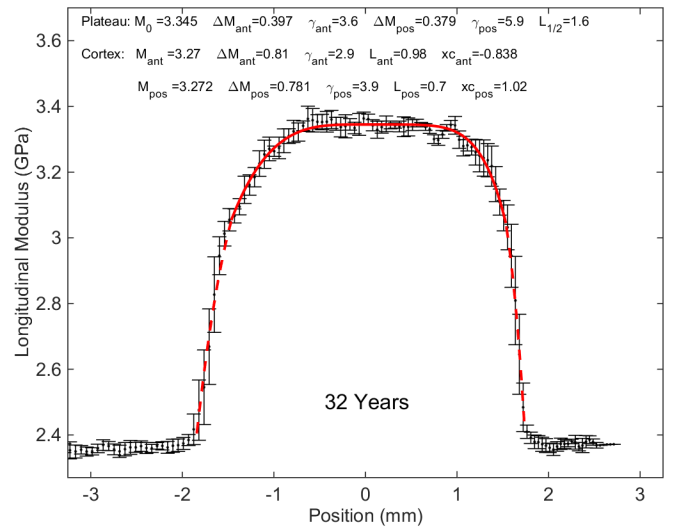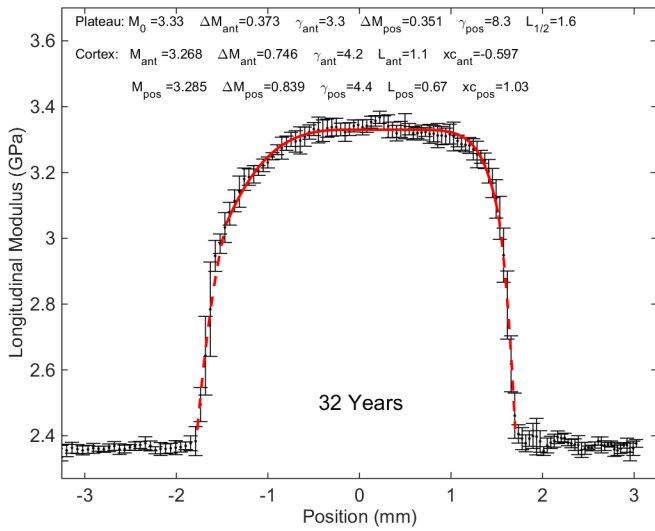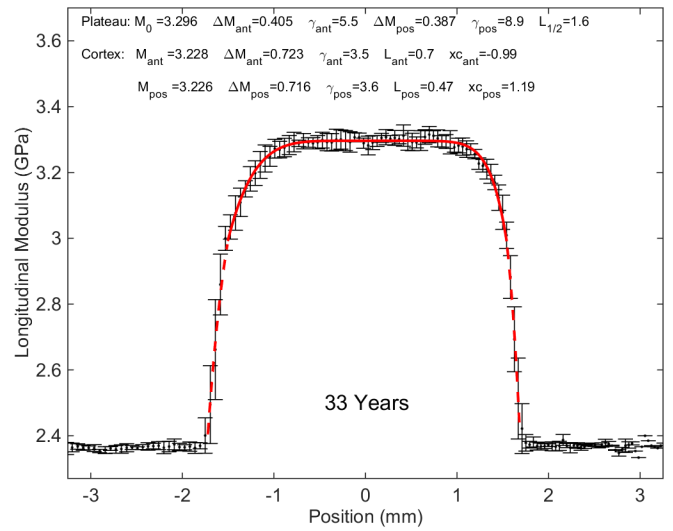

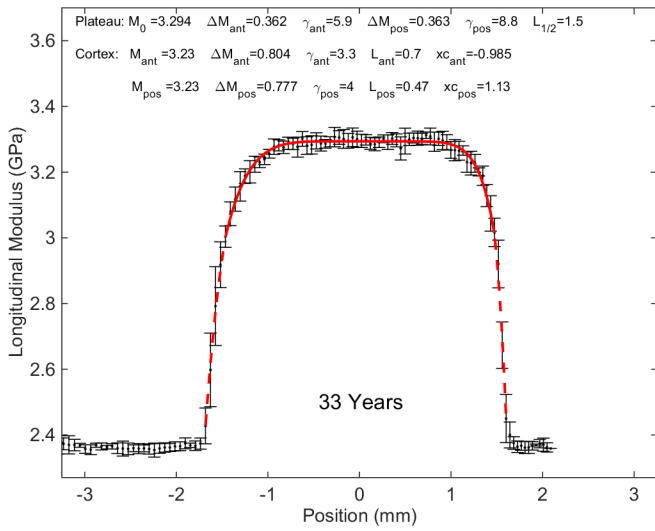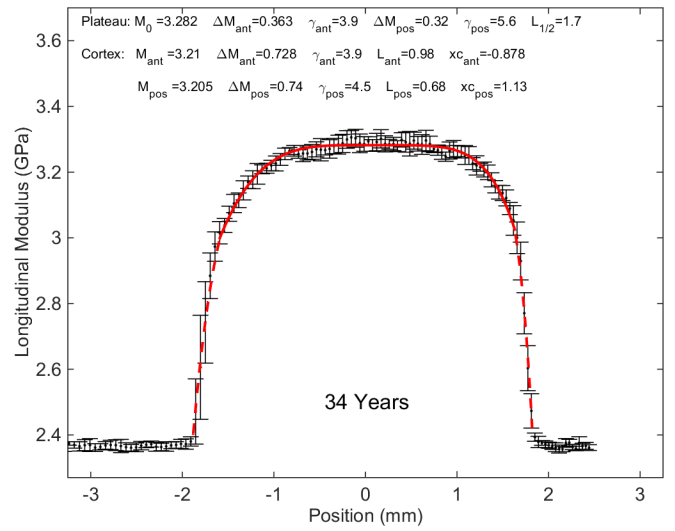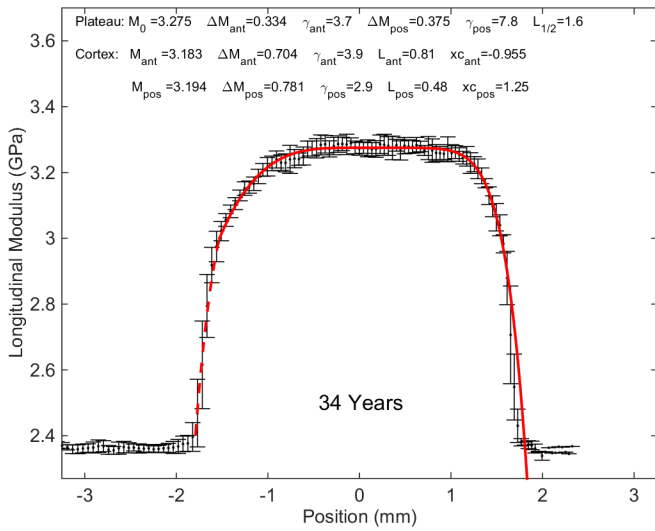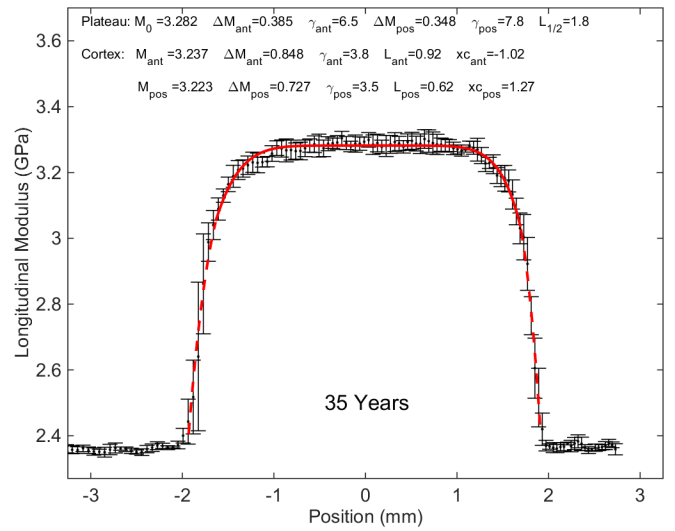

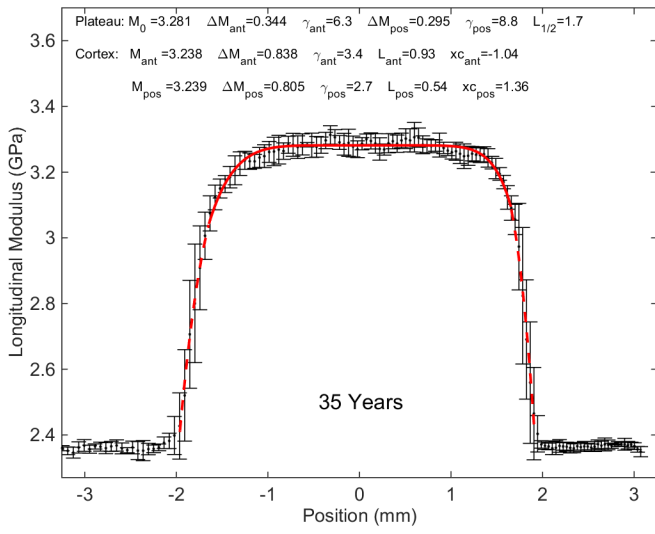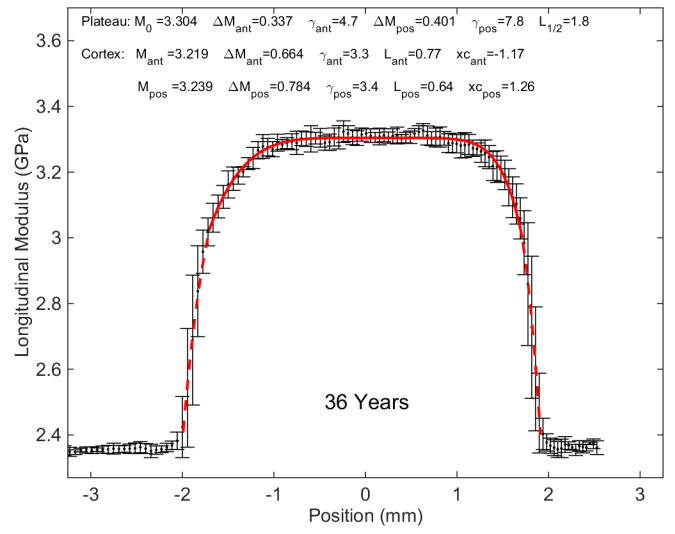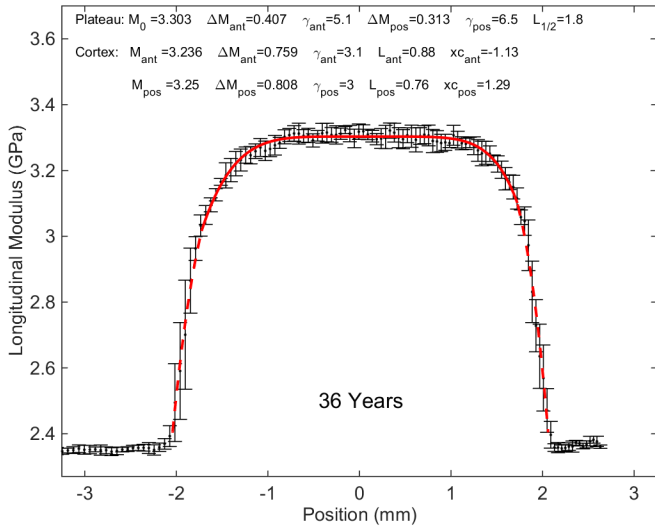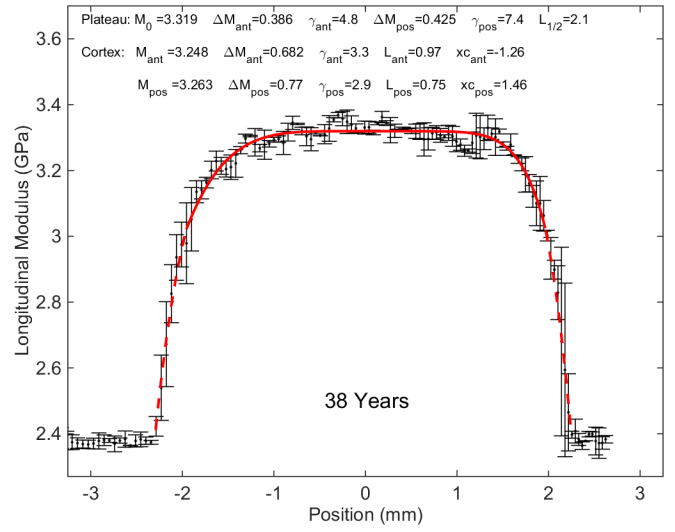



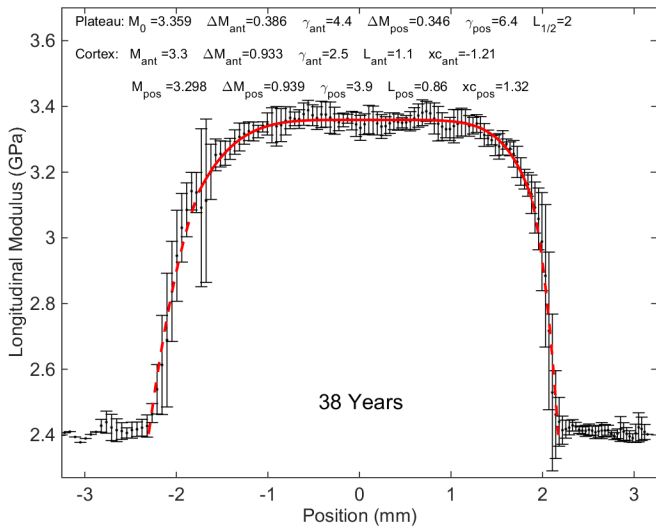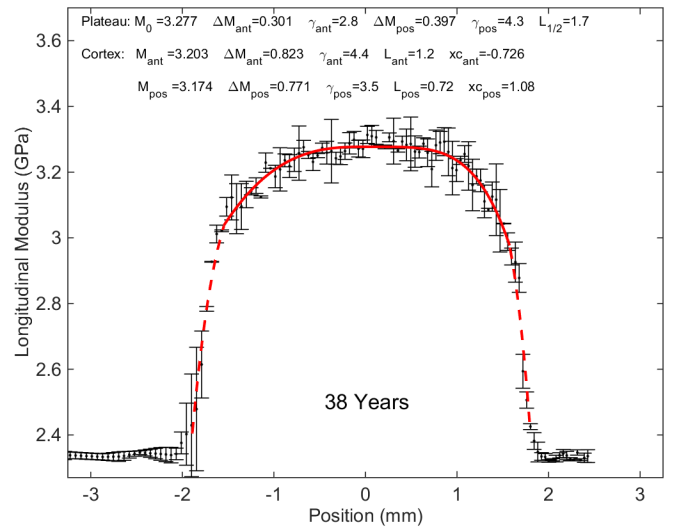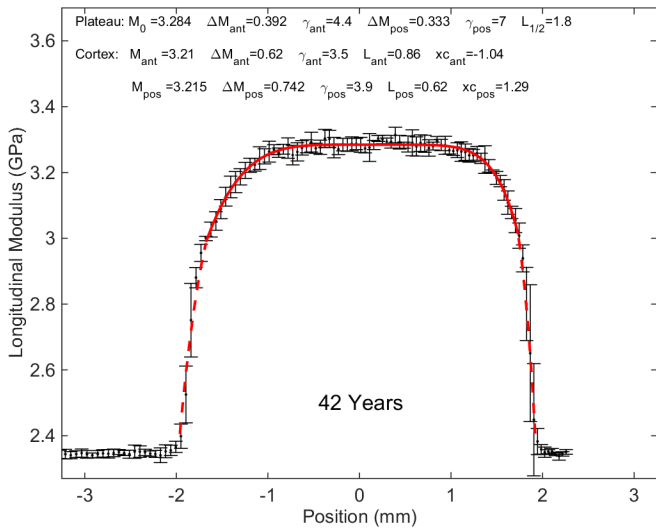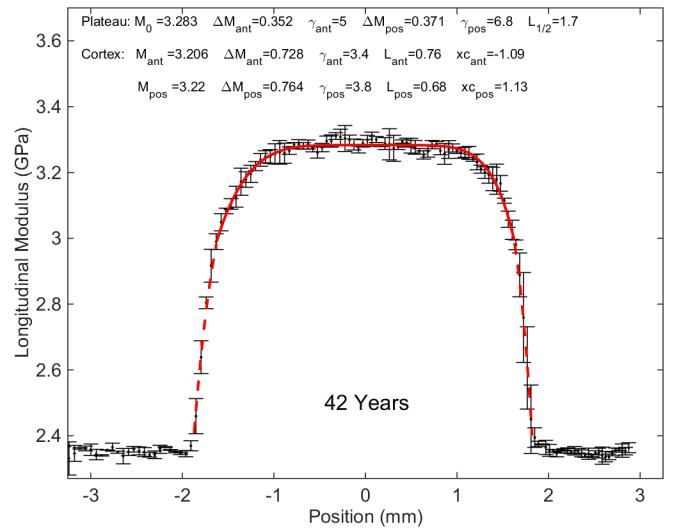

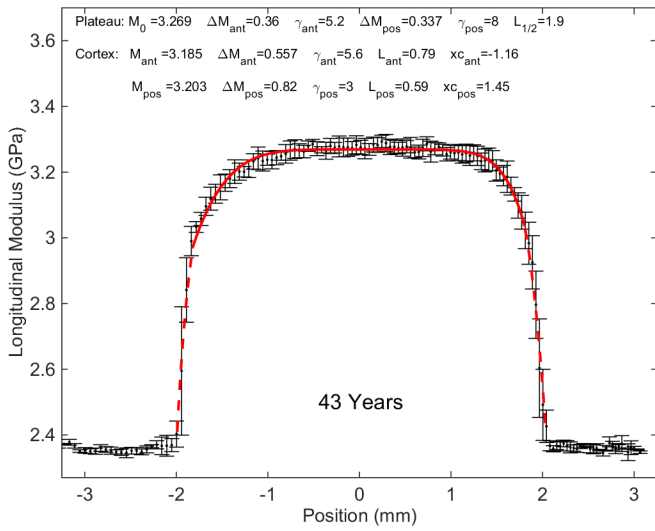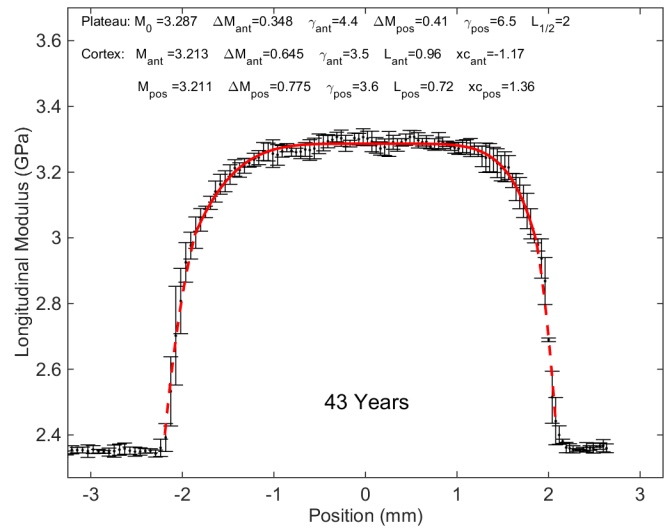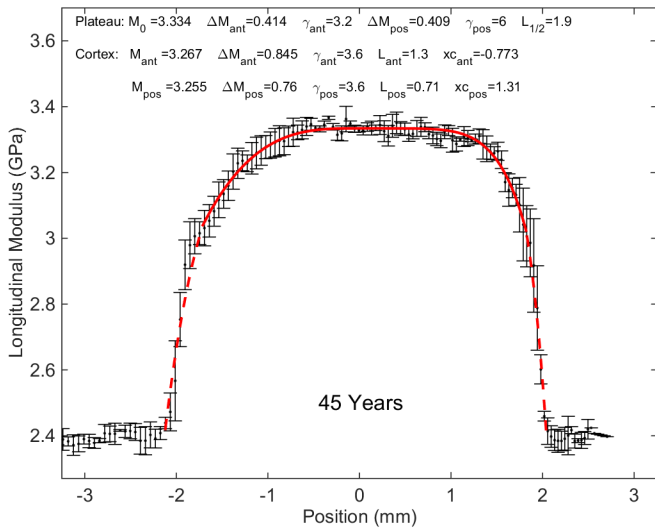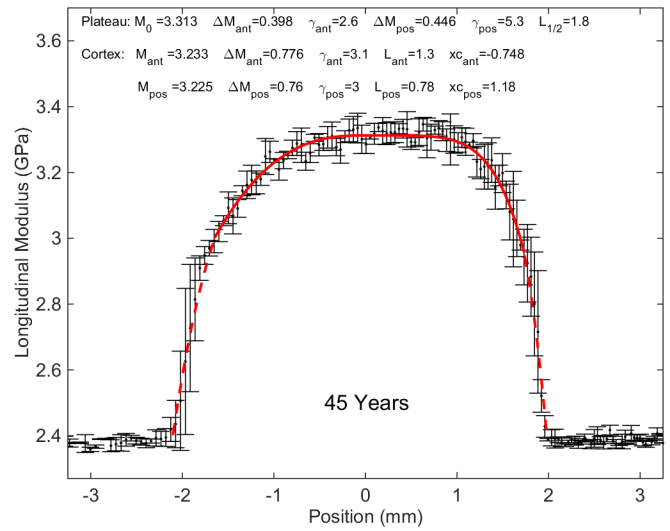

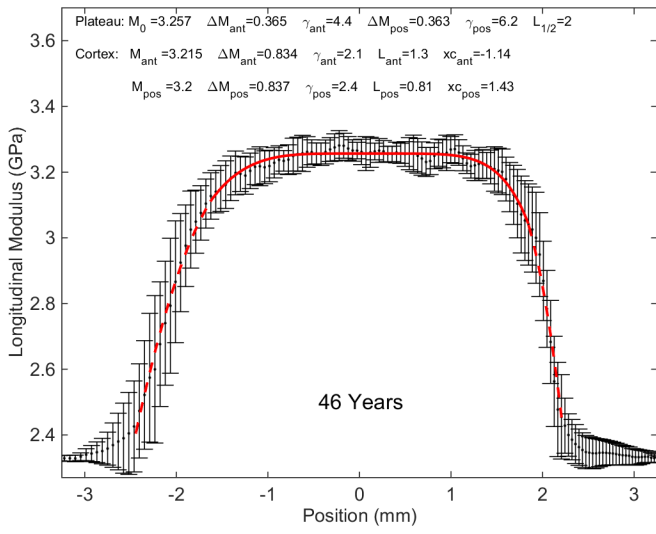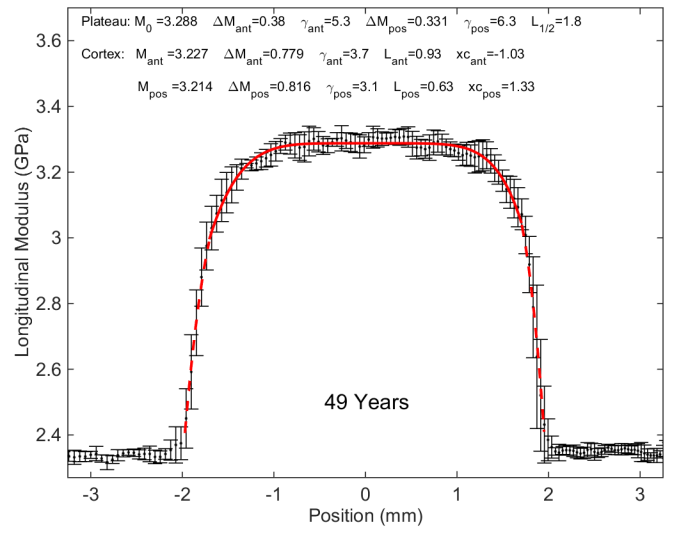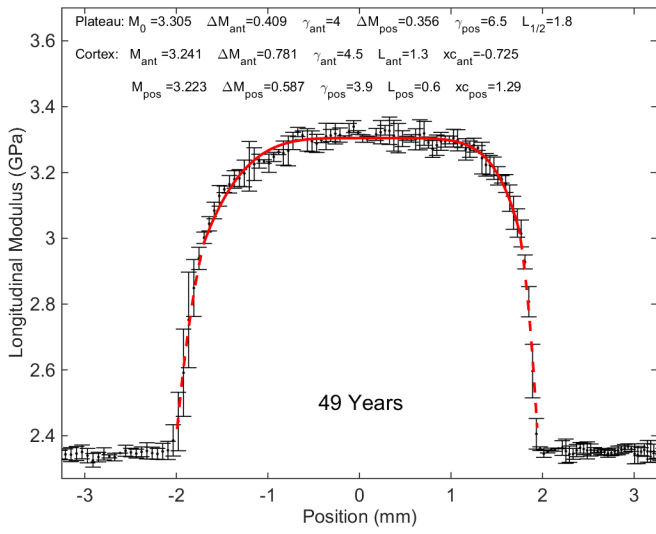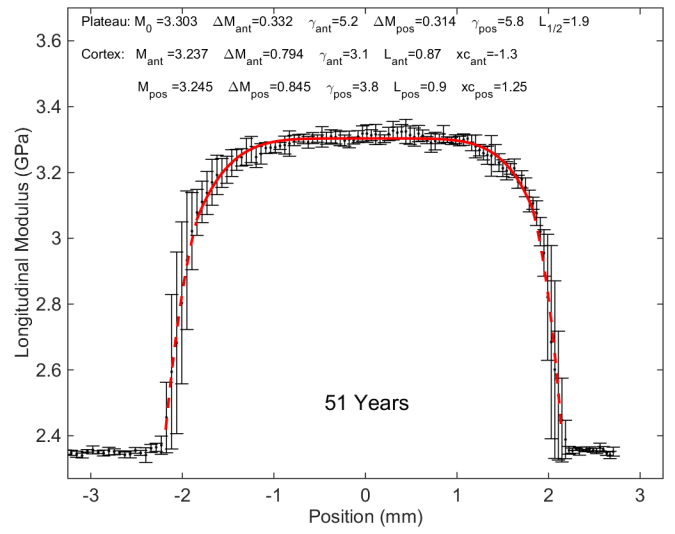

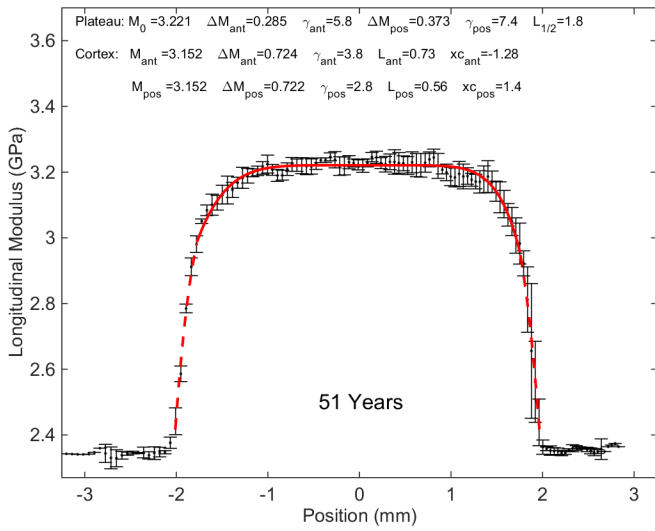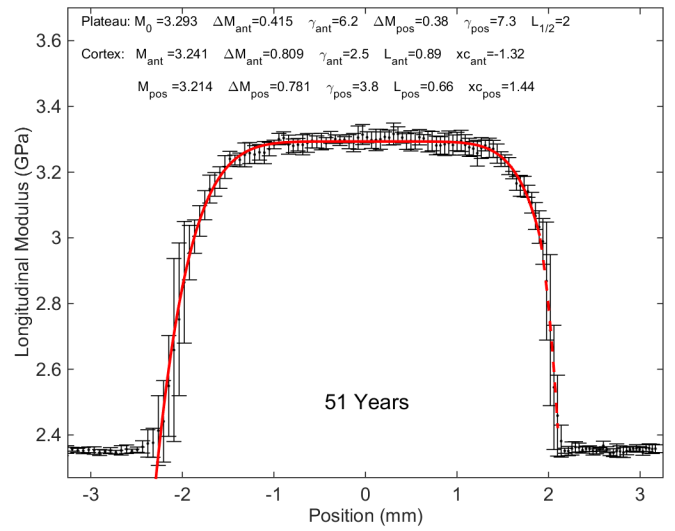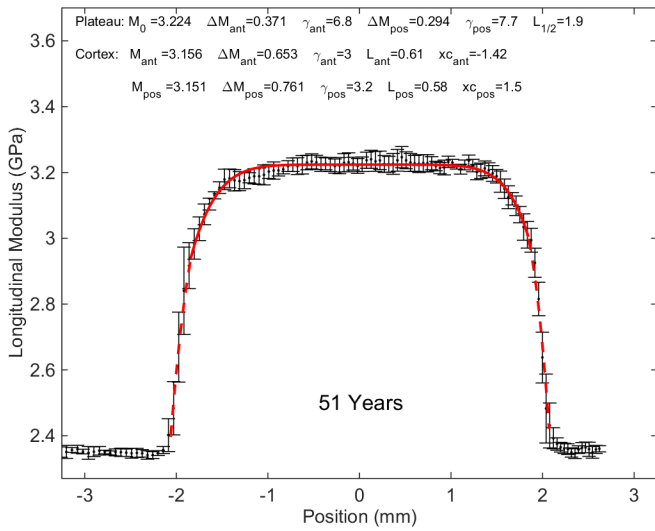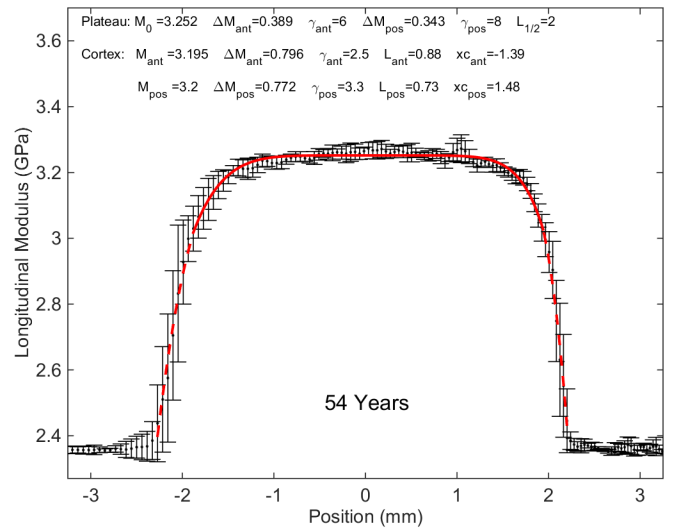

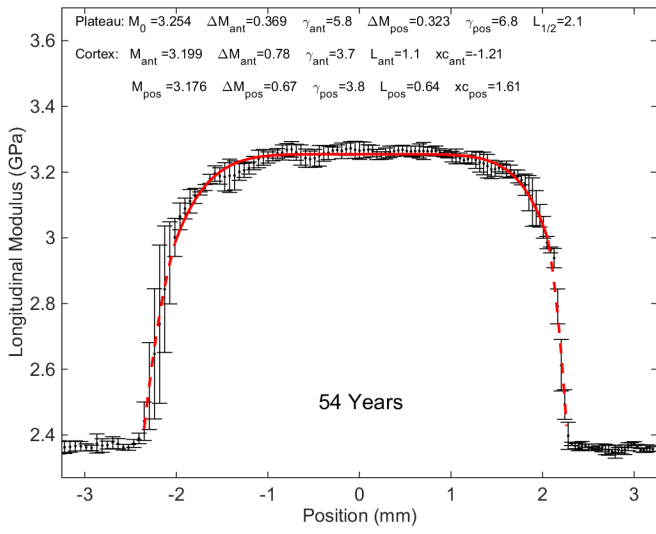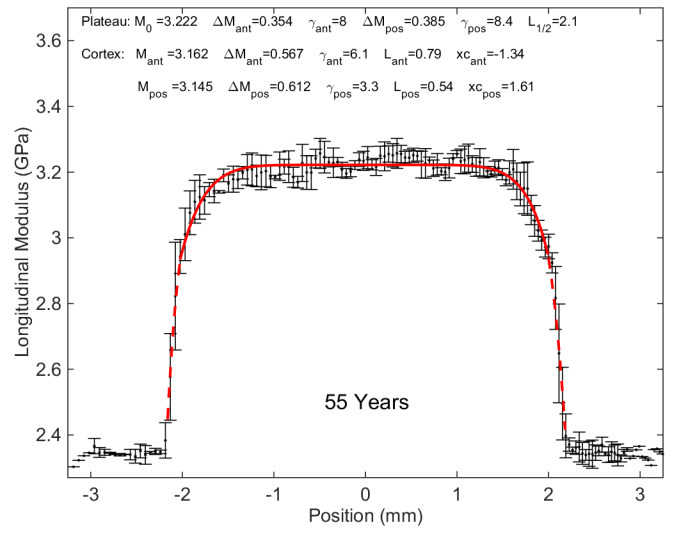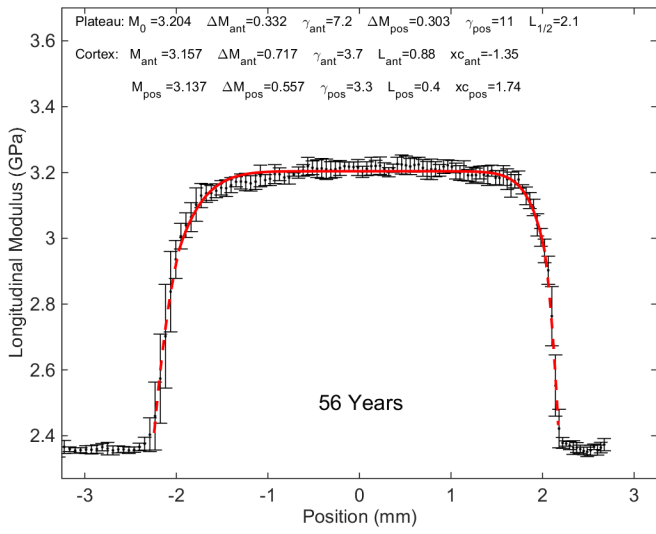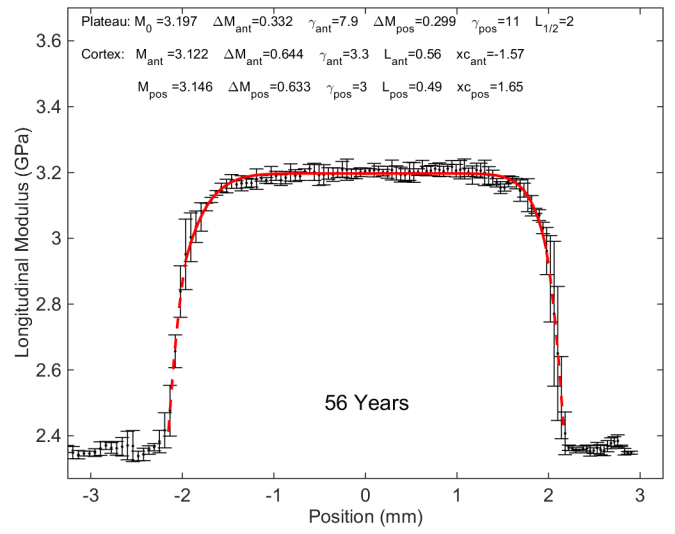

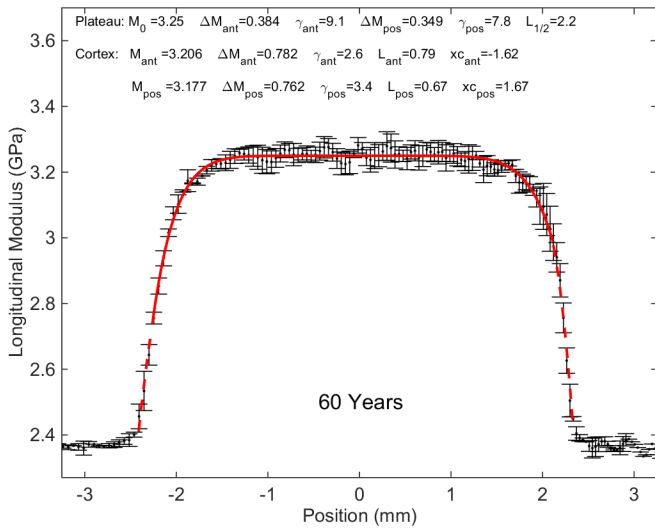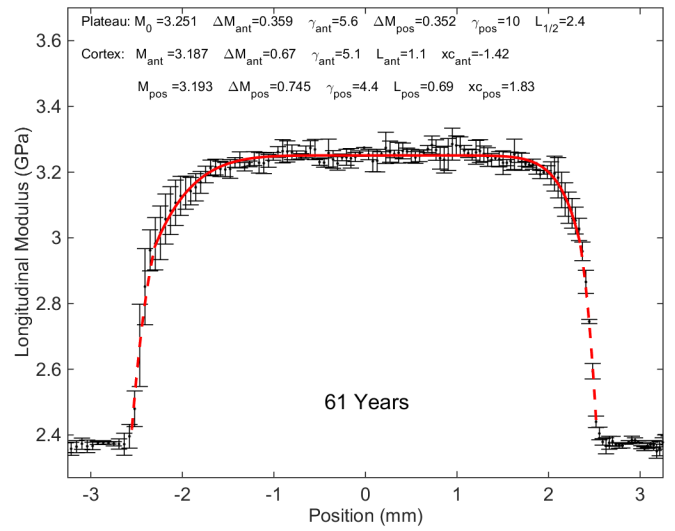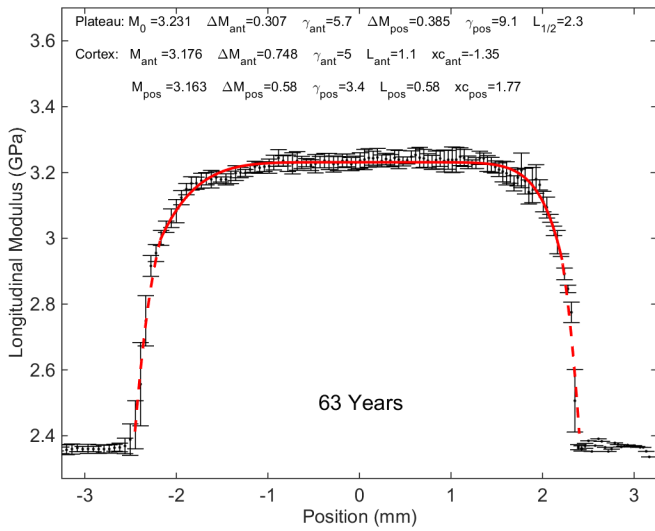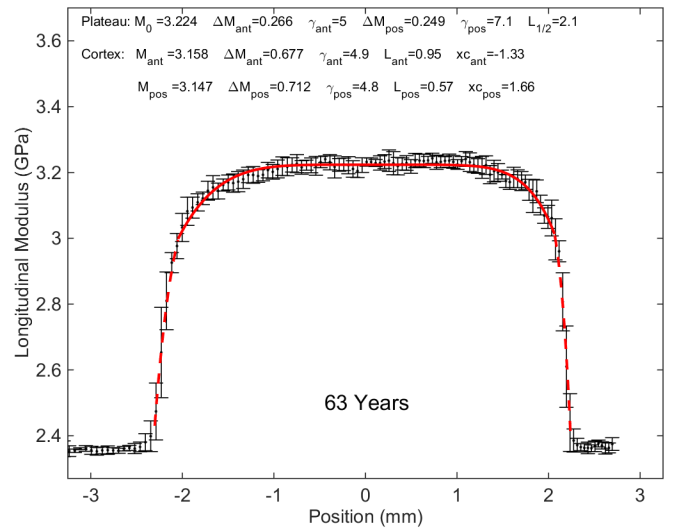

Supplement: iovs-57-10-76_s01.pdf [file iovs-57-10-76_s01.pdf]
